# Supplementary material for: Facile synthesis of Sn/MoS2/C composite as an anode material for lithium-ion batteries with outstanding performance
Source: Royal Society of Chemistry journal article supplement (doi:10.1039/c5nj02368h), 2015-11-20
Supplement: c5nj02368h1.pdf [file c5nj02368h1.pdf]

## Electronic Supplementary Information

### Facile synthesis of Sn/MoS<sub>2</sub>/C composite as anode materials for lithium-ion batteries with outstanding performance

Hongqiang Wang,<sup>ab</sup> Qichang Pan,<sup>a</sup> Jing Chen,<sup>a</sup> Yahui Zan,<sup>a</sup> Youguo Huang,<sup>\*a</sup> Guanhua Yang,<sup>a</sup> Zhixiong Yan,<sup>a</sup> and Qingyu Li<sup>\*a</sup>

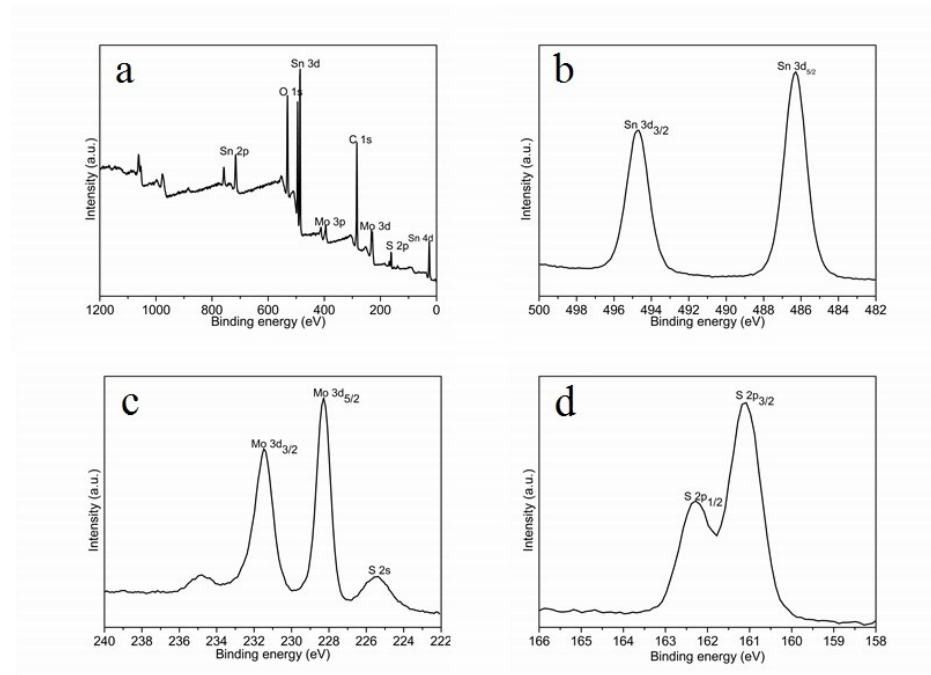

**Fig. S1** (a) The survey XPS spectrum of Sn/MoS<sub>2</sub>/C composites (b), (c) and (d)

The high-resolution XPS of Sn 3d, Mo3d and S2p, respectively.

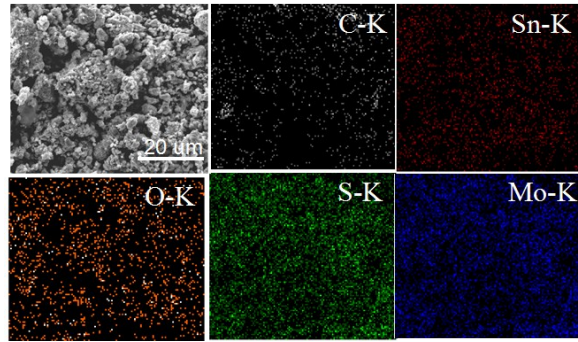

**Fig. S2** SEM and EDS mapping images of Sn/MoS<sub>2</sub>/C composite.

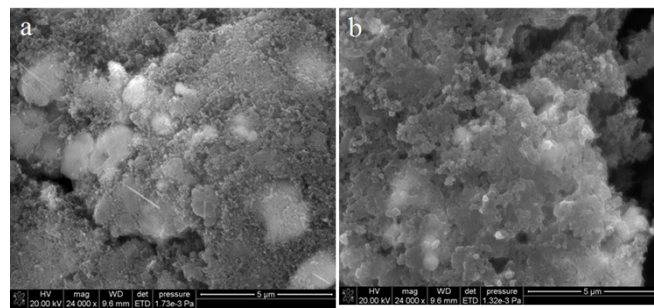

**Fig. S3** SEM images of Sn/MoS<sub>2</sub>/C electrode (a) before cycle and (b) after 50 cycles .
